# Supplementary material for: Effect of surfactant concentration in electrolyte on the fabrication and properties of nickel-graphene nanocomposite coating synthesized by electrochemical co-deposition
Source: Royal Society of Chemistry journal article supplement (doi:10.1039/c7ra13651j), 2018-01-01
Supplement: c7ra13651j1.pdf [file c7ra13651j1.pdf]

Electronic Supplementary Information (ESI)

**Effect of surfactant concentration in electrolyte on the fabrication and properties of nickel-graphene nanocomposite coatings synthesized by electrochemical co-deposition**

Ghulam Yasin<sup>a,b\*</sup>, Muhammad Arif<sup>a</sup>, Muhammad Naeem Nizam<sup>a</sup>, Muhammad Shakeel<sup>a</sup>, Muhammad Abubaker Khan<sup>c</sup>, Waheed Qamar Khan<sup>d</sup>, Tahira Mehtab Hassan<sup>e</sup>, Zaheer Abbas<sup>a</sup>, Iman Farahbakhsh<sup>f</sup> and Yu Zuo<sup>a\*</sup>

<sup>a</sup> State Key Laboratory of Chemical Resource Engineering, Beijing University of Chemical Technology, Beijing 100029, P.R. China

<sup>b</sup> BUCT-CWRU Joint International Laboratory, State Key Laboratory of Organic-Inorganic Composites, Center for Soft Matter Science and Engineering, College of Energy, Beijing University of Chemical Technology, Beijing 100029, P.R. China

<sup>c</sup> College of Materials Science and Engineering, Beijing Institute of Technology, Beijing 100081, P.R. China

<sup>d</sup> School of Materials Science and Engineering, Beijing University of Technology, Beijing 100029, P.R. China

<sup>e</sup> Department of Physics, The Islamia University of Bahawalpur, Bahawalpur, 63100, Pakistan

<sup>f</sup> Department of Engineering, Quchan Branch, Islamic Azad University, Quchan, Iran

**Corresponding Authors**

\* Email: [zuoy@mail.buct.edu.cn](mailto:zuoy@mail.buct.edu.cn) (Z.Yu)

\* Email: [yasin@mail.buct.edu.cn](mailto:yasin@mail.buct.edu.cn) (G.Yasin)

**ORCID**

Ghulam Yasin: 0000-0001-8794-3965

**Table S1.** Chemical composition (wt.%) of carbon steel grade (Q235).

| Elements | C         | Si   | Mn        | S     | P     | O    | N     | Fe   |
|----------|-----------|------|-----------|-------|-------|------|-------|------|
| Wt.%     | 0.14-0.20 | 0.30 | 0.30-0.70 | <0.04 | <0.04 | 0.01 | 0.004 | bal. |

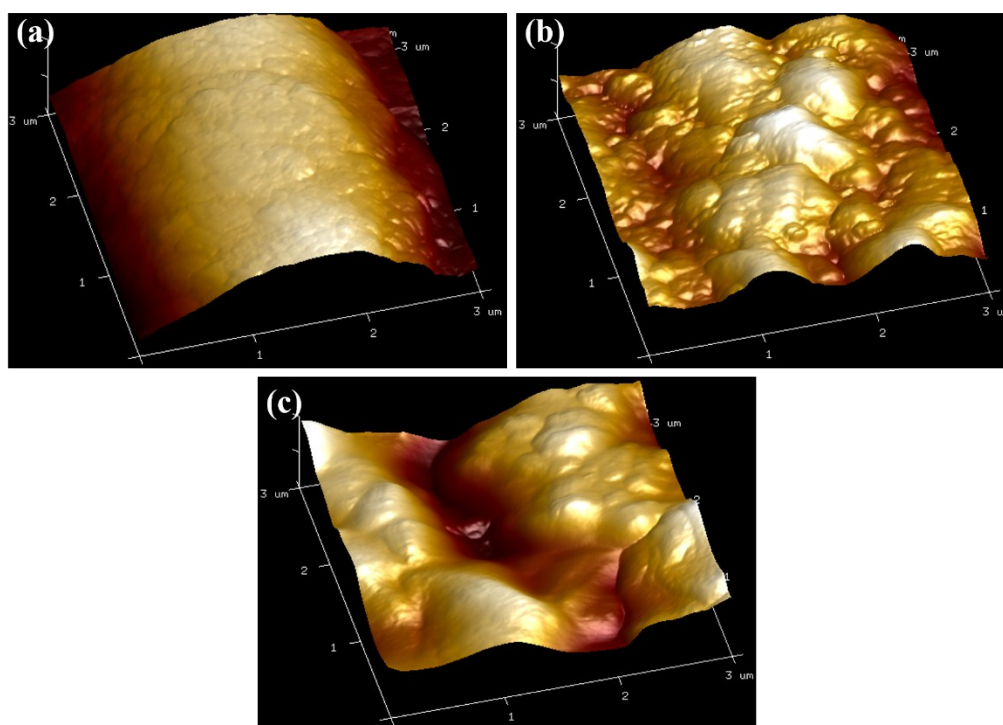

**Figure S1.** AFM micrographs of Ni/graphene nanocomposite coatings produced at different concentrations of SDS: (a) 0 g/L, (b) 0.2 g/L and (c) 0.4 g/L in the deposition solution.

**Table S2.** Effect of SDS on the grain sizes and texture coefficients of Ni/graphene coatings.

| <b>SDS</b><br>(g/L) | <b>Grain sizes</b><br>(nm) | <b>Texture coefficients</b> |         |         |
|---------------------|----------------------------|-----------------------------|---------|---------|
|                     |                            | TC(111)                     | TC(200) | TC(220) |
| 0                   | 26.59                      | 0.36                        | 0.57    | 0.07    |
| 0.2                 | 23.07                      | 0.24                        | 0.66    | 0.10    |
| 0.4                 | 19.2                       | 0.18                        | 0.71    | 0.11    |
